# Supplementary material
Source: PubMed Central journal article supplement (PMC4414809)
Supplement: NIHMS664745-supplement.pdf [file NIHMS664745-supplement.pdf]

## Supplemental material

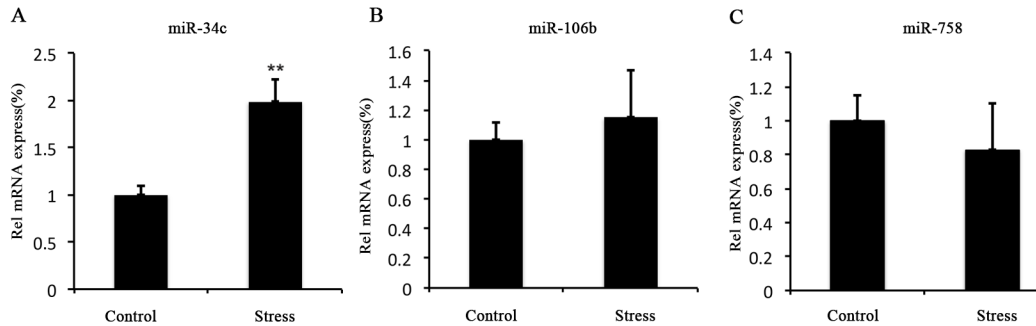

**Supplemental Figure1.** Changes of different microRNAs, miR-34c, miR106b and miR758 in the mouse hippocampus CA1 of unstressed (control) stressed animals (stress). The statistic results are presented as means  $\pm$  SEM., (n=5), \*\* $p$ <0.01 compare to control group determined by student  $t$ -test.

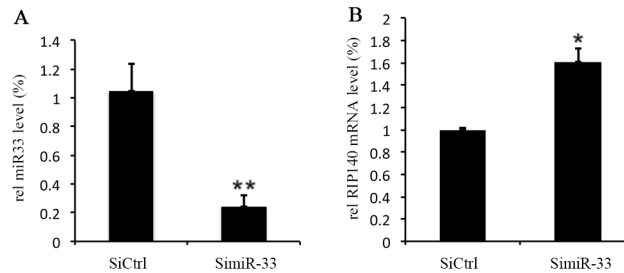

**Supplemental Figure2.** Expression of miR-33 level(A) and RIP140 mRNA level(B) in mouse hippocampus CA1 injected with siRNA of miR-33(SimiR-33) or scramble RNA(SiCtrl) detected by qPCR. The statistic results are presented as means  $\pm$  SEM., (n=5), \* $p$ <0.05 and \*\* $p$ <0.01 compare to control group determined by student  $t$ -test.

### Supplemental table1. Primers list

| Name   | Sequence                     |
|--------|------------------------------|
| Lrp1   | 5'-GAGTGTTCCTGTATGGCAC-3'    |
|        | 5'-GATGCCTTGGATGATGGTC-3'    |
| ldlr   | 5'-CTGTTCCACCTCTGTTTAC-3'    |
|        | 5'-AGTGAGATACGGCGAATAGA-3'   |
| hmgcr  | 5'-CTTGTGGAATGCCTTGTGATTG-3' |
|        | 5'-AGCCGAAGCAGCACATGAT-3'    |
| Srebp1 | 5'-GGCCGAGATGTGCCGA-3'       |
|        | 5'-TTGTTGATGAGCTGGAGCATGT-3' |

Supplemental table 2

|              | Recordings(% of control) |       |       |       |       | Average                    | sub-groups |
|--------------|--------------------------|-------|-------|-------|-------|----------------------------|------------|
| Animals(FST) | Rec 1                    | Rec 2 | Rec 3 | Rec 4 | Rec 5 | (% of unstressed behavior) |            |
| Cage1        |                          |       |       |       |       |                            |            |
| 1            | 3.37                     | 22.47 | 8.42  | 4.31  | 11.32 | 9.978                      | S-UR       |
| 2            | 39.47                    | 43.29 | 37.43 | 59.83 | 25.67 | 41.138                     | S-R        |
| 3            | 44.46                    | 33.42 | 38.43 | 32.43 | 41.42 | 38.032                     | S-R        |
| 4            | 36.4                     | 47.24 | 35.42 | 44.24 | 33.43 | 39.346                     | S-R        |
| Cage2        |                          |       |       |       |       |                            |            |
| 1            | 33.47                    | 31.22 | 27.42 | 48.32 | 44.32 | 36.95                      | S-R        |
| 2            | 8.34                     | 6.42  | 11.34 | 1.45  | 7.31  | 6.972                      | S-UR       |
| 3            | 2.42                     | 2.32  | 15.34 | 11.48 | 4.42  | 7.196                      | S-UR       |
| 4            | 17.34                    | 19.31 | 36.32 | 19.32 | 48.54 | 28.166                     | Excluded   |
| Cage3        |                          |       |       |       |       |                            |            |
| 1            | 9.32                     | 21.34 | 3.32  | 12.32 | 2.42  | 9.744                      | S-UR       |
| 2            | 6.32                     | 13.43 | 14.64 | 2.42  | 12.32 | 9.826                      | S-UR       |
| 3            | 46.23                    | 53.42 | 41.32 | 52.42 | 44.23 | 47.524                     | S-R        |
| 4            | 11.32                    | 31.42 | 12.42 | 24.53 | 17.42 | 19.422                     | Excluded   |
